# Demographic and Clinical Features and Prescribing Patterns of Psychotropic Medications in Patients with the Melancholic Subtype of Major Depressive Disorder in China

Yu-Tao Xiang<sup>1,2\*9</sup>, Gang Wang<sup>2\*9</sup>, Chen Hu<sup>29</sup>, Tong Guo<sup>29</sup>, Gabor S. Ungvari<sup>3</sup>, Amy M. Kilbourne<sup>4,5</sup>, Kelly Y. C. Lai<sup>1</sup>, Tian-Mei Si<sup>6</sup>, Qi-Wen Zheng<sup>7</sup>, Da-Fang Chen<sup>7</sup>, Yi-Ru Fang<sup>8</sup>, Zheng Lu<sup>9</sup>, Hai-Chen Yang<sup>10</sup>, Jian Hu<sup>11</sup>, Zhi-Yu Chen<sup>12</sup>, Yi Huang<sup>13</sup>, Jing Sun<sup>14</sup>, Xiao-Ping Wang<sup>15</sup>, Hui-Chun Li<sup>16</sup>, Jin-Bei Zhang<sup>17</sup>, Helen F. K. Chiu<sup>1</sup>

**1** Department of Psychiatry, Chinese University of Hong Kong, Hong Kong SAR, China, **2** Mood Disorders Center, Beijing Anding Hospital, Capital Medical University, Beijing, China, **3** University of Notre Dame Australia/Marian Centre, Perth, Western Australia, Australia, **4** Veterans Administration Ann Arbor Center for Clinical Management Research, Ann Arbor, Michigan, United States of America, **5** Department of Psychiatry, University of Michigan Medical School, Ann Arbor, Michigan, United States of America, **6** Key Laboratory of Mental Health, Ministry of Mental Health & Peking University Institute of Mental Health, Beijing, China, **7** Department of Epidemiology and Biostatistics, Peking University Health Science Center, Beijing, China, **8** Division of Mood Disorders, Shanghai Mental Health Center, Shanghai Jiao Tong University School of Medicine, Shanghai, China, **9** Shanghai Tongji Hospital, Tongji University Medical School, Shanghai, China, **10** Division of Mood Disorders, Shenzhen Mental Health Centre, Shenzhen, Guangdong Province, China, **11** The First Hospital of Harbin Medical University, Harbin, Heilongjiang Province, China, **12** Hangzhou Seventh People's Hospital, Hangzhou, Zhejiang Province, China, **13** West China Hospital, Sichuan University, Chengdu, Sichuan Province, China, **14** The Affiliated Brain Hospital, Nanjing Medical University, Nanjing, Jiangsu Province, China, **15** Mental Health Institute, The Second Xiangya Hospital, Central South University, Changsha, Hunan Province, China, **16** The Second Affiliated Hospital, College of Medicine, Zhejiang University, Hangzhou, Zhejiang Province, China, **17** The Third Affiliated Hospital of Sun Yat-Sen University, Guangzhou, Guangdong Province, China

## Abstract

**Background:** Little has been known about the demographic and clinical features of the melancholic subtype of major depressive disorder (MDD) in Chinese patients. This study examined the frequency of melancholia in Chinese MDD patients and explored its demographic and clinical correlates and prescribing patterns of psychotropic drugs.

**Methods:** A consecutively collected sample of 1,178 patients with MDD were examined in 13 psychiatric hospitals or psychiatric units of general hospitals in China nationwide. The cross-sectional data of patients' demographic and clinical characteristics and prescriptions of psychotropic drugs were recorded using a standardized protocol and data collection procedure. The diagnosis of the melancholic subtype was established using the Mini International Neuropsychiatric Interview (MINI). Medications ascertained included antidepressants, mood stabilizers, antipsychotics and benzodiazepines.

**Results:** Six hundred and twenty nine (53.4%) of the 1,178 patients fulfilled criteria for melancholia. In multiple logistic regression analyses, compared to non-melancholic counterparts, melancholic MDD patients were more likely to be male and receive benzodiazepines, had more frequent suicide ideations and attempts and seasonal depressive episodes, while they were less likely to be employed and receive antidepressants and had less family history of psychiatric disorders and lifetime depressive episodes.

**Conclusions:** The demographic and clinical features of melancholic MDD in Chinese patients were not entirely consistent with those found in Western populations. Compared to non-melancholic MDD patients, melancholic patients presented with different demographic and clinical features, which have implications for treatment decisions.

**Citation:** Xiang Y-T, Wang G, Hu C, Guo T, Ungvari GS, et al. (2012) Demographic and Clinical Features and Prescribing Patterns of Psychotropic Medications in Patients with the Melancholic Subtype of Major Depressive Disorder in China. PLoS ONE 7(6): e39840. doi:10.1371/journal.pone.0039840

**Editor:** Xiang Yang Zhang, Baylor College of Medicine, United States of America

**Received:** April 18, 2012; **Accepted:** May 28, 2012; **Published:** June 29, 2012

**Copyright:** © 2012 Xiang et al. This is an open-access article distributed under the terms of the Creative Commons Attribution License, which permits unrestricted use, distribution, and reproduction in any medium, provided the original author and source are credited.

**Funding:** This study was funded by the National Key Scientific and Technological Projects for the 11th Five-Year from the Ministry of Science and Technology of China (Project Title: Early Diagnostic Assessment and Standardized Treatment Approach for Depression; No.2007BA117B05). The study was initiated by the Chinese Society of Psychiatry (CSP) with support from AstraZeneca China. AstraZeneca China had no role in the study design, generating or interpreting the results. The funders had no role in study design, data collection and analysis, decision to publish, or preparation of the manuscript.

**Competing Interests:** The authors have read the journal's policy and have the following conflicts: AstraZeneca China helped organize the inter-rater reliability exercise, but neither funded this study directly, nor had role in the study design, generating or interpreting the results. This does not alter the authors' adherence to all the PLoS ONE policies on sharing data and materials.

\* E-mail: xyutly@gmail.com (YTX); gangwangdoc@gmail.com (GW)

<sup>9</sup> These authors contributed equally to this work.

## Introduction

Since the term melancholia was first operationally defined in the DSM-III [1,2], melancholic depression, also described as “typical”, “endogenous”, “endogenomorphic”, “type A” and “autonomous” depression [3–5], has been the topic of continuous debate whether it represents an etiologically distinct syndrome or only a more severe variant of major depression. In DSM-III melancholia was not listed as a separate diagnosis [1]; in DSM-IV, it was still not separated from major depressive disorder (MDD) [6]. Both the DSM-III and DSM-IV melancholia criteria are inconsistent with features of melancholia described by empirical studies in which it is postulated as a distinct entity in terms of clinical profile, treatment response and biological markers [7,8]. For example, compared to non-melancholic depression, melancholic depression usually respond better to electroconvulsive therapy (ECT) and broad-action tricyclic (TCA) than other classes of antidepressants [8]. Therefore, many researchers advocate that melancholia be listed as a distinct, identifiable and separate mood syndrome in the coming DSM-V classification [7].

In the past decade the characteristic features of melancholia have been comprehensively studied with varying results [9–11]. For example, some studies found that melancholia was more frequent in men [9,12], which was not confirmed in other studies [11]. In addition, these findings were almost entirely obtained in Western populations. Given the fact that features of mood disorders are not independent of the complex interplay of the biopsychosocial environment [13], research findings in the West do not cover the full range of mood symptoms experienced by Chinese patients [14,15]. Thus, it is necessary to examine the demographic and clinical features in Chinese melancholic patients.

There have been limited data on the frequency and features of melancholic MDD in East Asia including China. In a recent study Sun et al. [16] interviewed 1,970 Chinese women with MDD diagnosed by the Composite International Diagnostic Interview (CIDI) and found that in contrast to non-melancholia, melancholic MDD patients were older, had older age at onset, more episodes of illness and higher rates of lifetime generalized anxiety disorder. However, major weaknesses of this study including convenience sampling and inclusion of only female patients limit the generalization of the findings. In addition, the use of psychotropic drugs in melancholic MDD was not examined; this aspect has seldom been reported in the literature. We could not locate similar studies from other Eastern Asian countries, such as Japan and Korea, by searching English-language journals.

In order to improve the validity of diagnosis of bipolar disorders (BD) and rationalize its treatment, the Chinese Society of Psychiatry initiated a nation-wide study entitled the Diagnostic Assessment Service for People with Bipolar Disorders in China (DASP) that aims to test the usefulness of screening tools for BD in patients initially diagnosed as MDD [17,18]. The current study, a secondary analysis of the data of the DASP project, set out (1) to determine the frequency of melancholia in Chinese patients with MDD based on the Mini International Neuropsychiatric Interview (MINI); and (2) to explore its demographic and clinical correlates and prescribing patterns of antidepressants, mood stabilizers, antipsychotics and benzodiazepines.

## Methods

### Ethics Statement

The study protocol was approved centrally by the Clinical Research Ethics Committee of Beijing Anding Hospital, Capital Medical University, China and the Clinical Research Ethics

Committees of the respective study centers. All patients provided informed consent to participate in this study.

### Study Participants and Settings

The first survey of the DASP project was conducted in 13 major psychiatric hospitals/units located in north, south, east, west and central parts of China representing a range of clinical settings from September 1, 2010 through February 28, 2011. Patients were screened and enrolled if they were aged between 16 and 65 years, were inpatients or outpatients, had a diagnosis of DSM-IV MDD ascertained by the MINI, understood the aims of the study and provided informed consent. Exclusion criteria included (1) past diagnosis of BD; (2) history or ongoing significant medical or neurological condition(s); (3) depressive disorders secondary to a general medical or neurological condition; and (4) Having received electroconvulsive therapy (ECT) in the past month.

### Instrument and Assessment Procedure

Consecutive sampling method was used in this study. Patients with a diagnosis of MDD receiving treatment in the participating hospitals/units were consecutively referred by their treating psychiatrists to the research team to be screened for eligibility. Patients fulfilling the above entry criteria were invited to participate in the study.

The patients' basic demographic and clinical data were collected with a questionnaire designed for the study in the course of a clinical interview supplemented by a review of their medical records. Following an earlier study [19], the diagnostic assessment of melancholia was conducted with the Chinese version of the MINI, Version 5.0, to establish DSM-IV diagnosis of the melancholic subtype of MDD [20,21].

Prior to the study all thirteen raters were trained in the use of MINI in twenty patients with MDD. In this reliability exercise, the kappa values of their judgments on melancholia were more than 0.80 for each rater. After providing written consent following a full explanation about the study, participating patients met a rater for a confirmatory diagnostic interview.

### Analysis

Data were analyzed with the SPSS 13.0. Comparisons of the demographic and clinical characteristics and prescribing patterns of psychotropic drugs between melancholic patients and those without it were performed by multiple logistic regression analyses with the “Enter” method. The diagnosis of melancholia was entered as the dependent variable and demographic and clinical characteristics and prescribing patterns of psychotropic medications (see Table 1) were entered as independent variables. The level of significance was set at 0.05 (two-tailed).

### Results

Altogether, 1,757 patients were invited to participate in the study; 270 (15.4%) refused, 309 (17.6%) fulfilled DSM-IV criteria for BD and 1,178 (67.0%) for MDD. In the MDD group, 629 (53.4%) had melancholia based on the MINI. Table 1 shows the basic demographic and clinical characteristics and the use of psychotropic drugs for the whole sample and separately by diagnoses. In multiple logistic regression analysis melancholic patients were more likely to be male, receive benzodiazepines and have more frequent suicide ideations and attempts and seasonal depressive episodes, while they were less likely to be employed and receive antidepressants, and had less family history of psychiatric disorders and lifetime depressive episodes.

**Table 1.** Basic demographic and clinical characteristics of MDD patients with or without melancholia.

|                                                                       | The whole sample<br>(n = 1,178) |           | Nonmelancholic<br>(n = 549) |           | Melancholic<br>(n = 629) |           | Statistics <sup>a</sup> |            |        |
|-----------------------------------------------------------------------|---------------------------------|-----------|-----------------------------|-----------|--------------------------|-----------|-------------------------|------------|--------|
|                                                                       | N                               | %         | N                           | %         | N                        | %         | O.R.                    | 95% CI     | P      |
|                                                                       |                                 |           |                             |           |                          |           |                         |            |        |
| Male                                                                  | 385                             | 32.7      | 154                         | 28.1      | 231                      | 36.7      | 1.6                     | 1.3, 2.1   | <0.001 |
| Married/cohabitating                                                  | 824                             | 69.9      | 379                         | 69.0      | 445                      | 70.7      | 1.1                     | 0.8, 1.5   | 0.5    |
| Employed                                                              | 812                             | 68.9      | 406                         | 74.0      | 406                      | 64.5      | 0.7                     | 0.5, 0.9   | 0.004  |
| Education                                                             |                                 |           |                             |           |                          |           |                         |            |        |
| Primary and junior secondary school                                   | 356                             | 30.2      | 150                         | 27.3      | 206                      | 32.8      | 1.0                     | --         | --     |
| Senior secondary school                                               | 312                             | 26.5      | 137                         | 25.0      | 175                      | 27.8      | 1.0                     | 0.7, 1.4   | 0.8    |
| College and university                                                | 465                             | 39.5      | 241                         | 43.9      | 224                      | 35.6      | 0.8                     | 0.5, 1.1   | 0.1    |
| Postgraduate                                                          | 45                              | 3.8       | 21                          | 3.8       | 24                       | 3.8       | 1.0                     | 0.5, 1.9   | 0.9    |
| Depressive episodes with increased appetite and sleep and weight gain | 179                             | 15.2      | 90                          | 16.4      | 89                       | 14.1      | 0.9                     | 0.6, 1.2   | 0.4    |
| Depressive episodes with suicidal ideation and/or attempts            | 665                             | 56.5      | 304                         | 55.4      | 361                      | 57.4      | 1.3                     | 1.004, 1.6 | 0.047  |
| Depressive episodes with psychotic symptoms                           | 158                             | 13.4      | 67                          | 12.2      | 91                       | 14.5      | 1.3                     | 0.9, 1.9   | 0.1    |
| Seasonal depressive episodes                                          | 134                             | 11.4      | 56                          | 10.2      | 78                       | 12.4      | 1.7                     | 1.2, 2.6   | 0.008  |
| Family history of psychiatric disorders                               | 203                             | 17.2      | 114                         | 20.8      | 89                       | 14.1      | 0.6                     | 0.5, 0.9   | 0.004  |
| Any use of antidepressants                                            | 820                             | 69.9      | 412                         | 75.0      | 408                      | 64.9      | 0.6                     | 0.5, 0.8   | <0.001 |
| Any use of antipsychotics                                             | 226                             | 19.2      | 104                         | 18.9      | 122                      | 19.4      | 1.1                     | 0.8, 1.5   | 0.4    |
| Any use of mood stabilizers                                           | 44                              | 3.7       | 28                          | 5.1       | 16                       | 2.5       | 0.6                     | 0.3, 1.1   | 0.1    |
| Any use of benzodiazepines                                            | 192                             | 16.3      | 77                          | 14.0      | 115                      | 18.3      | 1.6                     | 1.1, 2.2   | 0.01   |
|                                                                       | <b>Mean</b>                     | <b>SD</b> | <b>Mean</b>                 | <b>SD</b> | <b>Mean</b>              | <b>SD</b> |                         |            |        |
| Age (years)                                                           | 40.5                            | 12.8      | 40.29                       | 12.6      | 40.8                     | 13.1      | 1.0                     | 0.9, 1.01  | 0.6    |
| Age at onset (years)                                                  | 34.6                            | 12.5      | 33.9                        | 11.9      | 35.3                     | 13.0      | 1.0                     | 0.9, 1.03  | 0.2    |
| Lifetime depressive episodes                                          | 1.9                             | 2.6       | 2.2                         | 2.9       | 1.6                      | 2.2       | 0.9                     | 0.87, 0.98 | 0.005  |

<sup>a</sup>multiple logistic regression analyses with the nonmelancholic cohort as the reference group.  
doi:10.1371/journal.pone.0039840.t001

## Discussion

The frequency of melancholia among MDD patients (53.4%) found in this study was within the range of the 20% to 80% reported in the literature [3]. Our result is similar to the findings in MDD patients from Western countries; for example 50% in a US community sample [22] and 44% in New Zealand outpatients [10], but considerably lower than a recent finding in China [16]. In a convenience sample of 1,970 female Chinese MDD patients 81.3% were diagnosed as melancholia based on the CIDI [16]. The wide discrepancy between Sun et al.'s finding and ours might be due to selection bias (convenience vs. consecutive sampling; female sex vs. both sexes) and interviewing techniques (the CIDI vs. MINI).

Sex difference in depression has been well reported with higher heritability of depression in women [23,24]. However, it is unclear whether sex differences exist in frequency of melancholic depression. In line with some [9,12], but not all [11] studies, the proportion of melancholia was more frequent in men than women in this study. Melancholic depression is characterized with cognitive slowing [6] and low level of functioning [11], which could perhaps account for the lower employment rate compared to non-melancholic MDD.

Melancholic patients had greater risk of suicidal ideation and attempts and more use of benzodiazepines in this study, which

might be due to the severity of depression and more frequent comorbidity, such as anxiety, in this patient group [9–11]. Unlike previous findings in Western settings that melancholic patients have a larger number of episodes and increased familial loading [16,22], in this study melancholia was associated with less family history of psychiatric disorders and lifetime depressive episodes.

Melancholia is usually more severe than the non-melancholic subtype [11], therefore it is reasonable to assume that they are more likely to receive antidepressant treatment. In this study, surprisingly only 64.9% of melancholic patients were on antidepressants, lower than the figure (75.0%) in non-melancholic patients. We cannot explain this striking finding based on the current study design; this result needs to be replicated in future surveys.

Melancholic patients had more seasonal episodes in this study, a finding that has not been reported previously. We also have no clear explanation for this pattern except assuming that seasonality might be a manifestation of a disturbed biological rhythm and, as such, a sign of the biological nature of melancholic depression.

The merits of this study are its large, multicentre sample and the standardized diagnostic assessment of melancholic MDD. However, the results should be interpreted with caution due to certain limitations. First, the cross-sectional nature of the study could not reflect the causal relationships between demographic and clinical variables and melancholic MDD. Second, no standardized

instruments were used to measure the severity of depressive symptoms. Third, some potentially important clinical and psychosocial factors, such as history of childhood abuse, length of depressive episodes and rating of stressful life events, were not measured. Fourth, the sampling was not random, thus the sample cannot adequately represent all MDD patients in China. However, the participating centres are major tertiary institutions located in different parts of China, hence the current sample is broadly representative of the real life clinical practice in China. Finally, most background information was gleaned from patients or their medical records that is a hardly reliable source.

In conclusion, there are significant differences between non-melancholic MDD in a host of demographic and clinical characteristics and antidepressant prescription patterns that have implications for treatment decisions. In addition, although it has been reported that melancholic MDD is a biologically more distinct syndrome in a number of studies, its demographic and

clinical features in Chinese patients, such as less lifetime depressive episodes, less likely to receive antidepressants and more seasonal episodes, are neither entirely consistent with those found in Western melancholic patients, nor have been reported previously.

## Acknowledgments

The authors are grateful to Dr. Faith Dickerson from the Stanley Research Program at Sheppard Pratt, Baltimore, MD, USA, for her comments.

## Author Contributions

Conceived and designed the experiments: GW. Performed the experiments: CH TG T-MS Y-RF ZL H-CY JH Z-YC YH JS X-PW H-CL J-BZ. Analyzed the data: Y-TX GSU AMK HFKC KYCL Q-WZ D-FC. Contributed reagents/materials/analysis tools: Y-TX GSU AMK HFKC KYCL. Wrote the paper: Y-TX T-MS Y-RF ZL H-CY HFKC KYCL JH Z-YC YH JS X-PW H-CL J-BZ.

## References

1. APA. Diagnostic and Statistical Manual of Mental Disorders. 3<sup>rd</sup> ed. Washington, American Psychiatric Association, 1980.
2. Parker G (2000) Classifying depression: should paradigms lost be regained? *Am J Psychiatry* 157: 1195–1203.
3. Taylor MA, Fink M (2006) Melancholia: the diagnosis, pathophysiology and treatment of depressive illness. Cambridge, UK: Cambridge University Press.
4. Parker G, Hadzi-Pavlovic D (1996) Melancholia: A Disorder of Movement and Mood.
5. Klein DF (1974) Endogenomorphic depression. A conceptual and terminological revision. *Arch Gen Psychiatry* 31: 447–454.
6. APA. Diagnostic and Statistical Manual of Mental Disorders. 4<sup>th</sup> ed. Washington, American Psychiatric Association, 1994.
7. Parker G, Fink M, Shorter E, Taylor MA, Akiskal H, et al. (2010) Issues for DSM-5: whither melancholia? The case for its classification as a distinct mood disorder. *Am J Psychiatry* 167: 745–747.
8. Taylor MA, Fink M (2008) Restoring melancholia in the classification of mood disorders. *J Affect Disord* 105: 1–14.
9. Angst J, Gamma A, Benazzi F, Ajdacic V, Rossler W (2007) Melancholia and atypical depression in the Zurich study: epidemiology, clinical characteristics, course, comorbidity and personality. *Acta Psychiatr Scand Suppl*: 72–84.
10. Joyce PR, Mulder RT, Luty SE, McKenzie JM, Sullivan PF, et al. (2002) Melancholia: definitions, risk factors, personality, neuroendocrine markers and differential antidepressant response. *Aust N Z J Psychiatry* 36: 376–383.
11. Melartin T, Leskela U, Rytasala H, Sokero P, Lestela-Mielonen P, et al. (2004) Co-morbidity and stability of melancholic features in DSM-IV major depressive disorder. *Psychol Med* 34: 1443–1452.
12. Hildebrandt MG, Stage KB, Kragh-Soerensen P (2003) Gender differences in severity, symptomatology and distribution of melancholia in major depression. *Psychopathology* 36: 204–212.
13. Schotte CK, Van Den Bossche B, De Doncker D, Claes S, Cosyns P (2006) A biopsychosocial model as a guide for psychoeducation and treatment of depression. *Depress Anxiety* 23: 312–324.
14. Lee DT, Kleinman J, Kleinman A (2007) Rethinking depression: an ethnographic study of the experiences of depression among Chinese. *Harv Rev Psychiatry* 15: 1–8.
15. Kleinman A (2004) Culture and depression. *N Engl J Med* 351: 951–953.
16. Sun N, Li Y, Cai Y, Chen J, Shen Y, et al. (2012) A comparison of melancholic and nonmelancholic recurrent major depression in Han Chinese women. *Depress Anxiety* 29: 4–9.
17. Hu C, Xiang YT, Ungvari GS, Dickerson FB, Kilbourne AM, et al. (2012) Undiagnosed bipolar disorder in patients treated for major depression in China. *J Affect Disord*.
18. Hu C, Xiang YT, Wang G, Ungvari GS, Dickerson FB, et al. (2012) Screening for bipolar disorder with the Mood Disorders Questionnaire in patients diagnosed as major depressive disorder – The experience in China. *J Affect Disord*; doi:10.1016/j.jad.2012.1002.1035.
19. Mallinckrodt CH, Watkin JG, Liu C, Wohlreich MM, Raskin J (2005) Duloxetine in the treatment of Major Depressive Disorder: a comparison of efficacy in patients with and without melancholic features. *BMC Psychiatry* 5: 1.
20. Sheehan DV, Lecrubier Y, Sheehan KH, Amorim P, Janavs J, et al. (1998) The Mini-International Neuropsychiatric Interview (M.I.N.I.): the development and validation of a structured diagnostic psychiatric interview for DSM-IV and ICD-10. *J Clin Psychiatry* 59 Suppl 20: 22–33; quiz 34–57.
21. Si TM, Shu L, Dang WM, Su YA, Chen JX, et al. (2009) Evaluation of the Reliability and Validity of Chinese Version of the Mini International Neuropsychiatric Interview in Patients with Mental Disorders (in Chinese). *Chinese Mental Health Journal* 23: 493–503.
22. Kendler KS (1997) The diagnostic validity of melancholic major depression in a population-based sample of female twins. *Arch Gen Psychiatry* 54: 299–304.
23. Kendler KS, Gatz M, Gardner CO, Pedersen NL (2006) A Swedish national twin study of lifetime major depression. *Am J Psychiatry* 163: 109–114.
24. Ma X, Xiang YT, Cai ZJ, Li SR, Xiang YQ, et al. (2009) Prevalence and socio-demographic correlates of major depressive episode in rural and urban areas of Beijing, China. *J Affect Disord* 115: 323–330.
